# Supplementary material
Source: MDPI journal article supplement (https://www.mdpi.com/2073-4395/13/3/880)
Supplement: s1 [file s1 › agronomy-2196940-Supplementary.pdf]

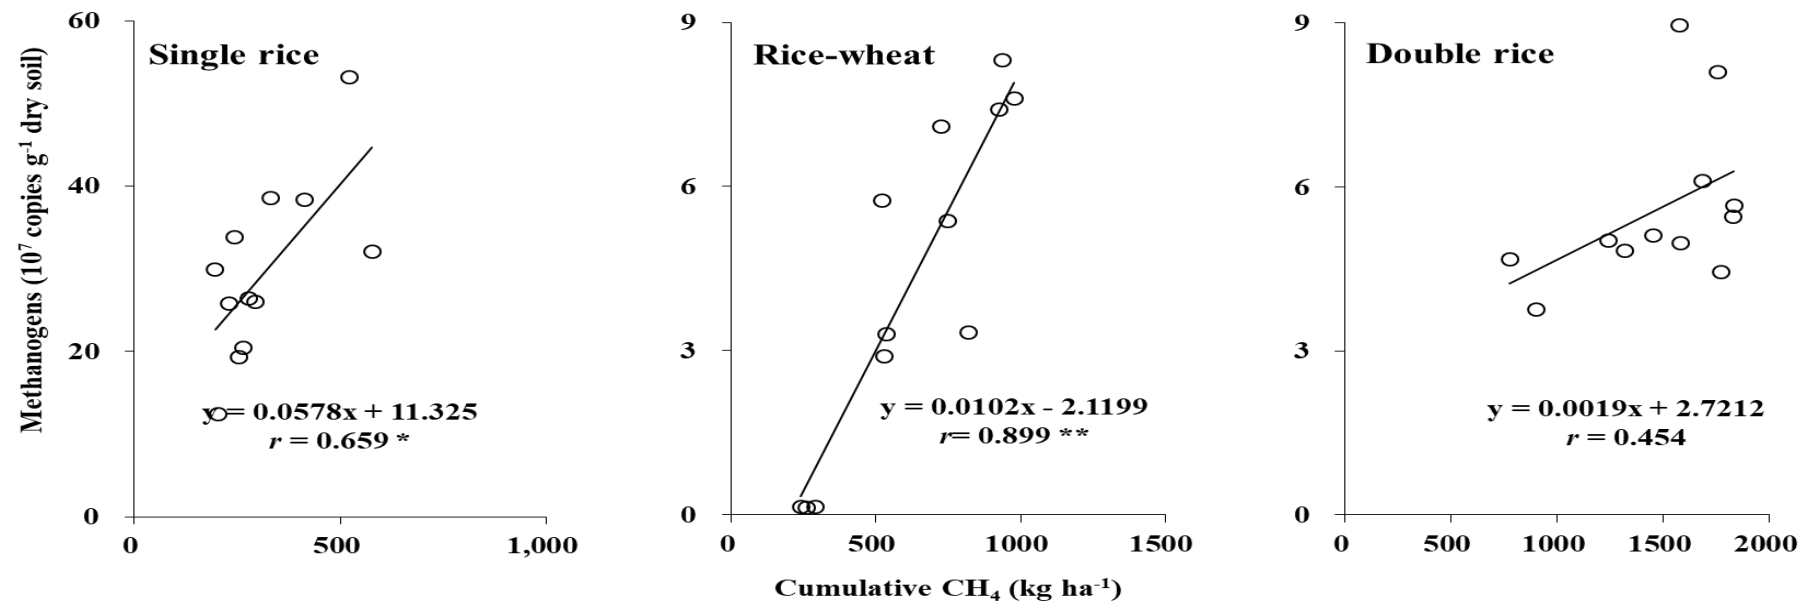

**Figure S1.** Correlations between cumulative CH<sub>4</sub> emission and methanogenic. \*, \*\* indicates significance at 0.05, 0.01 probability level in each cropping systems.
